# Supplementary material for: MicroRNA Expression Profile Changes after Cardiopulmonary Bypass and Ischemia/Reperfusion-Injury in a Porcine Model of Cardioplegic Arrest
Source: PubMed Central journal article supplement (PMC7236010; doi:10.3390/diagnostics10040240), 2020-04-21
Supplement: diagnostics-10-00240-s001.pdf [file diagnostics-10-00240-s001.pdf]

1 **Supplemental Table 1: List of Primer Sequences for Real Time PCR**

| Gene                 | Forward              | Reverse                |
|----------------------|----------------------|------------------------|
| <i>Actb</i>          | CACGCCATCCTGCGTCTGGA | AGCACCGTGTGGCGTAGAG    |
| <i>Tnf-alpha</i>     | GGCCCAAGGACTCAGATCAT | CTGTCCCTCGGCTTTGACAT   |
| <i>Interleukin-6</i> | ATGTCGAGGCTGTGCAGATT | TTGTGTTCTTCATCCACTCGT  |
| <i>Bcl2</i>          | CATGCGGCCTCTATTTGATT | CCCGTGGACTTCACTTATGG   |
| <i>Hmgb1</i>         | GGCTGCTAAGCTGAAGGAGA | GCTGCATCAGGCTTCCCTTT   |
| <i>Casp1</i>         | GAAGCAAGGGGTCGTATGGA | AGCCCAATAAGGGATGTCCG   |
| <i>Casp3</i>         | TTGAGACGGACAGTGGGACT | CGTCCTTTGAATTTCCGCCAGG |

2

3 **Supplemental Table 2: Top 20 differently expressed microRNAs identified by next-generation**  
4 **sequencing: on-pump vs. off-pump group.**

| microRNA ID     | logFC | logCPM | p-Value | FDR  | on-pump AVG | off-pump AVG |
|-----------------|-------|--------|---------|------|-------------|--------------|
| ssc-miR-122     | -4.00 | 5.75   | 0.00    | 0.00 | 6.2         | 98.3         |
| ssc-miR-10a-5p  | -1.28 | 5.73   | 0.00    | 0.00 | 30.6        | 74.5         |
| ssc-miR-193a-3p | 1.49  | 3.30   | 0.00    | 0.00 | 14.3        | 5.0          |
| ssc-miR-499-3p  | 0.83  | 6.38   | 0.00    | 0.00 | 106.0       | 59.5         |
| ssc-miR-374a-5p | 0.75  | 9.96   | 0.00    | 0.01 | 1252.3      | 744.3        |
| ssc-miR-345-5p  | 0.99  | 4.79   | 0.00    | 0.01 | 36.3        | 18.2         |
| ssc-miR-142-3p  | 1.05  | 5.30   | 0.00    | 0.01 | 52.4        | 25.5         |
| ssc-miR-424-5p  | 0.79  | 7.19   | 0.00    | 0.01 | 184.9       | 106.8        |
| ssc-miR-545-3p  | 1.13  | 2.87   | 0.00    | 0.02 | 9.3         | 4.3          |
| ssc-miR-30b-5p  | 0.72  | 11.09  | 0.00    | 0.02 | 2703.3      | 1641.6       |
| ssc-miR-145-5p  | 0.66  | 9.92   | 0.00    | 0.02 | 1183.7      | 751.5        |
| ssc-miR-374b-5p | 0.70  | 7.44   | 0.00    | 0.02 | 214.9       | 132.7        |
| ssc-miR-139-3p  | -0.77 | 4.39   | 0.00    | 0.02 | 14.9        | 25.6         |
| ssc-miR-190a    | 0.60  | 7.76   | 0.00    | 0.06 | 259.8       | 171.9        |
| ssc-miR-758     | 0.85  | 3.32   | 0.00    | 0.06 | 12.1        | 6.8          |
| ssc-miR-130a    | 0.62  | 9.37   | 0.00    | 0.06 | 803.1       | 522.9        |

|             |      |       |      |      |        |        |
|-------------|------|-------|------|------|--------|--------|
| ssc-miR-342 | 0.83 | 4.29  | 0.00 | 0.06 | 24.6   | 13.9   |
| ssc-miR-19a | 0.55 | 7.23  | 0.01 | 0.06 | 177.3  | 121.4  |
| ssc-miR-150 | 0.67 | 5.86  | 0.01 | 0.06 | 70.6   | 44.5   |
| ssc-miR-19b | 0.53 | 10.37 | 0.01 | 0.07 | 1563.1 | 1084.5 |

---

6 **Supplemental Table 3: Top 20 differently expressed microRNAs identified by next-generation**  
7 **sequencing: STH2-cold vs. STH2-warm group.**

| microRNA ID     | logFC | logCPM | p-value | FDR  | STH2-warm     |       |
|-----------------|-------|--------|---------|------|---------------|-------|
|                 |       |        |         |      | STH2-cold AVG | AVG   |
| ssc-miR-451     | 1.50  | 10.31  | 0.00    | 0.00 | 694           | 1969  |
| ssc-miR-146b    | -0.67 | 6.28   | 0.00    | 0.12 | 93            | 59    |
| ssc-miR-144     | 0.97  | 9.22   | 0.00    | 0.27 | 416           | 815   |
| ssc-miR-338     | -0.97 | 5.03   | 0.01    | 0.28 | 42            | 21    |
| ssc-miR-122     | -1.15 | 2.83   | 0.01    | 0.29 | 9             | 4     |
| ssc-miR-193a-5p | -0.62 | 3.11   | 0.01    | 0.29 | 10            | 7     |
| ssc-miR-20b     | -0.55 | 5.30   | 0.01    | 0.40 | 46            | 31    |
| ssc-miR-9-1     | -0.55 | 6.58   | 0.02    | 0.42 | 112           | 76    |
| ssc-miR-195     | -0.47 | 7.77   | 0.02    | 0.44 | 249           | 180   |
| ssc-miR-9-2     | -0.55 | 6.56   | 0.02    | 0.44 | 110           | 75    |
| ssc-miR-9       | -0.55 | 5.68   | 0.02    | 0.44 | 60            | 40    |
| ssc-miR-7137-5p | 0.48  | 3.13   | 0.03    | 0.61 | 7             | 10    |
| ssc-miR-4334-3p | 0.42  | 5.20   | 0.04    | 0.64 | 32            | 42    |
| ssc-miR-101     | 0.36  | 11.63  | 0.05    | 0.74 | 2812          | 3617  |
| ssc-miR-542-3p  | 0.31  | 9.18   | 0.05    | 0.76 | 523           | 650   |
| ssc-miR-497     | -0.39 | 9.17   | 0.06    | 0.78 | 646           | 494   |
| ssc-miR-208b    | 0.34  | 14.86  | 0.06    | 0.83 | 26550         | 33570 |
| ssc-miR-455-3p  | -0.37 | 7.33   | 0.07    | 0.84 | 180           | 139   |
| ssc-miR-503     | -0.36 | 5.18   | 0.08    | 0.85 | 40            | 31    |
| ssc-miR-744     | -0.40 | 4.44   | 0.08    | 0.85 | 24            | 18    |

8

9 **Supplemental Table Legends**

10 **Supplemental Table 1.** List of Primer Sequences for Real Time PCR

11 **Supplemental Table 2.** Top 20 differently expressed microRNAs identified by next-generation  
12 sequencing: on-pump vs. off-pump. The p-value describes the significance level for the fold change.  
13 The adjusted p-value describes the significance level after adjusting for multiple testing using  
14 Benjamini-Hochbergs method for false-discovery rate (FDR).

15 **Supplemental Table 3.** Top 20 differently expressed microRNAs identified by next-generation  
16 sequencing: STH2-cold vs. STH2-warm group. The p-value describes the significance level for the  
17 fold change. The adjusted p-value describes the significance level after adjusting for multiple testing  
18 using Benjamini-Hochbergs method for false-discovery rate (FDR).

19
